# Supplementary material for: Enhanced piezoelectric property in quenched BiFeO3-based piezoceramics: role of defects and mesophase
Source: Royal Society of Chemistry journal article supplement (doi:10.1039/c9tc06887b), 2020-01-01
Supplement: c9tc06887b1.pdf [file c9tc06887b1.pdf]

## Supplementary Material

### Enhanced piezoelectric property in quenched BiFeO<sub>3</sub>-based piezoceramics: role of defects and mesophase

Haiyan Zhao, Yudong Hou,\* Xiaole Yu, Mupeng Zheng, Mankang Zhu

College of Materials Science and Engineering, Key Laboratory of Advanced  
Functional Materials, Education Ministry of China, Beijing University of Technology,  
Beijing 100124, China

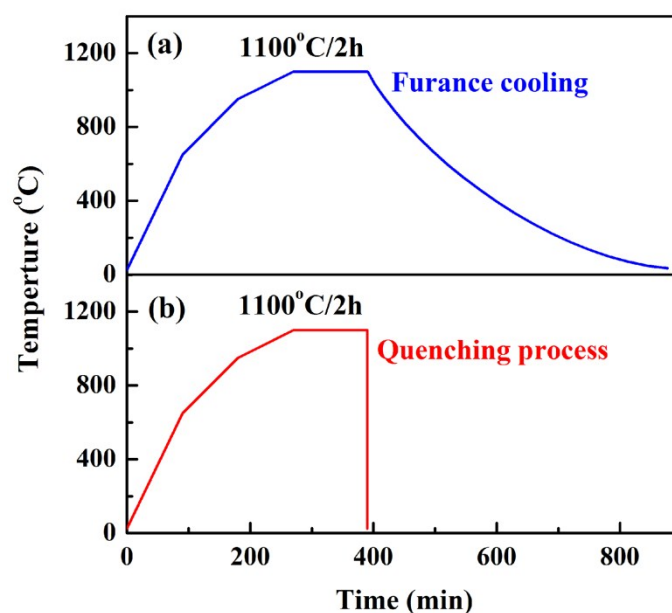

**Fig. S1** Sintering schedule of different heat treatments: (a) the normal sintered schedule, samples were sintered at 1100 °C for 2 h, and then cooled down with the furnace; (b) the quenching process schedule, samples were sintered at 1100 °C for 2 h, and then removed out of the furnace after sintering process and rapidly cooled down in the air.

---

\* Corresponding author. E-mail: [ydhoul@bjut.edu.cn](mailto:ydhoul@bjut.edu.cn)

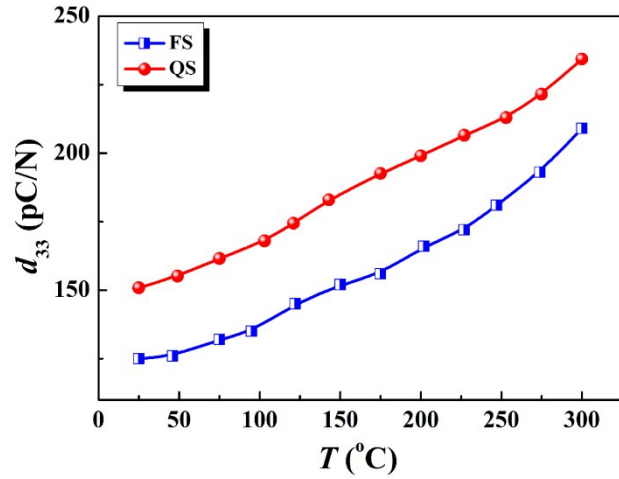

**Fig. S2** *In-situ* measurement of the  $d_{33}$  as a function of temperature for FS and QS samples.

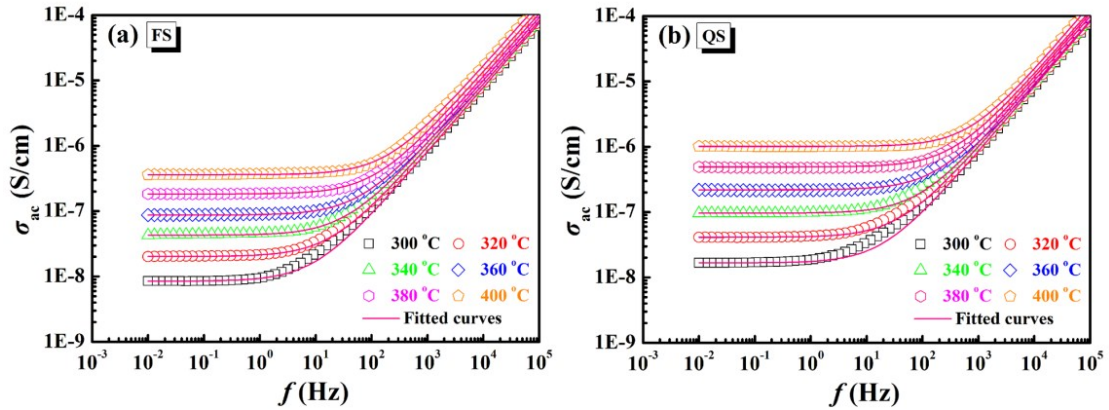

**Fig. S3** Frequency dependence of AC conductivity for (a) FS sample selected according to Ref.<sup>1</sup> and (b) QS ceramic at different temperature points between 300 °C and 400 °C.

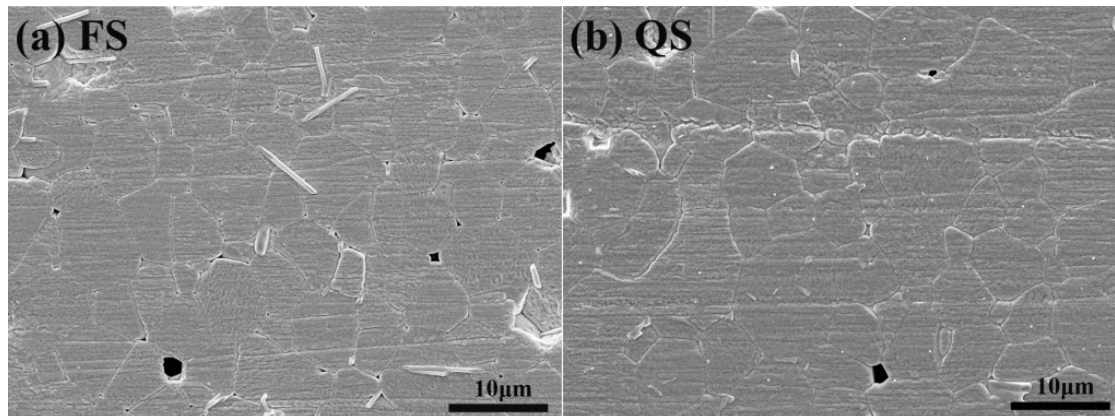

**Fig. S4** The SEM micrographs of (a) FS and (b) QS samples.

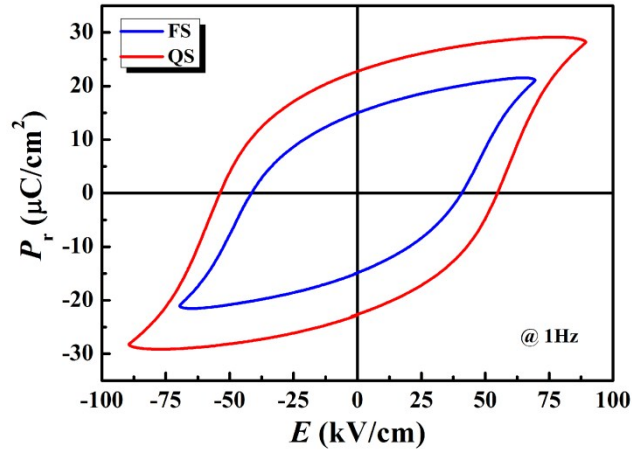

**Fig. S5**  $P$ - $E$  hysteresis loops of FS and QS samples, measured at 1 Hz.

**Table S1** Rietveld refinement parameters of FS and QS ceramics.

| Samples | Space group        | Lattice parameters |        |         | Phase fraction (%) | Refined factors |           |          |
|---------|--------------------|--------------------|--------|---------|--------------------|-----------------|-----------|----------|
|         |                    | a (Å)              | b (Å)  | c (Å)   |                    | $R_{wp}$ (%)    | $R_p$ (%) | $\chi^2$ |
| FS      | $P4mm$             | 3.9621             | 3.9621 | 4.1169  | 89.90              | 5.62            | 4.00      | 2.80     |
|         | $R3mr$             | 4.0310             | 4.0310 | 4.0310  | 10.10              |                 |           |          |
| QS      | $P4mm$             | 3.9606             | 3.9606 | 4.1193  | 87.61              | 4.28            | 2.82      | 3.70     |
|         | $R3mr$             | 4.0269             | 4.0269 | 4.0269  | 11.94              |                 |           |          |
|         | $FeBi_5Ti_3O_{15}$ | 5.4665             | 5.4335 | 41.0241 | 0.45               |                 |           |          |

## References

1. H. Zhao, Y. Hou, X. Yu, M. Zheng and M. Zhu, *J. Appl. Phys.*, 2018, **124**, 194103.
